# Supplementary material for: Optimal control nodes in disease-perturbed networks as targets for combination therapy
Source: PubMed Central journal article supplement (PMC6522545; doi:10.1038/s41467-019-10215-y), 2019-05-16
Supplement: 41467_2019_10215_MOESM3_ESM.pdf [file 41467_2019_10215_MOESM3_ESM.pdf]

## **Description of Additional Supplementay Files**

### **Supplementary Data 1. Human gene regulatory network used in this study.**

Interactions were collected from three manually curated pathway databases: Reactome (1,597 pathways)<sup>39</sup>, KEGG (195 pathways)<sup>40</sup>, and NCI-Nature Pathway Interaction Database (745 pathways)<sup>41</sup>. The network consists of 5,959 genes and 108,281 regulatory interactions.

### **Supplementary Data 2. Cancer-type-specific recurrently mutated cancer genes documented in the Catalogue of Somatic Mutations in Cancer (COSMIC) database<sup>42</sup>.**

### **Supplementary Data 3. Experimentally derived cancer-type-specific synthetic lethal interactions documented in the Synthetic Lethality Database (SynLethDB)<sup>43</sup> and a published study<sup>44</sup> on genetic interaction screen using the CRISPR-Cas9 technology.**

### **Supplementary Data 4. Supporting evidence for discovered optimal control nodes (OCNs) in three cancer types. HCC, hepatocellular carcinoma; LUAD, lung adenocarcinoma; BRCA, breast invasive carcinoma; Known cancer drug targets are obtained from the Therapeutic Target Database<sup>45</sup>. PMID, PubMed reference ID.**

### **Supplementary Data 5. Identified synergistic optimal control node (OCN) pairs in three cancer types. P-values were adjusted for multiple testing using the method of Benjamini-Hochberg.**

### **Supplementary Data 6. Supporting evidence for the role of crosstalk genes in therapy resistance. Literature evidence is presented for crosstalk genes controlled by both synergistic and non-synergistic OCN pairs.**

### **Supplementary Data 7. sgRNA sequences for CRISPR-based growth assay used in this study.**

### **Supplementary Data 8. Identified optimal control nodes (OCNs) and synergistic OCN pairs in melanoma.**

### **Supplementary Table 9. Proteins associated with treatment side effect from the study<sup>46</sup>.**
